# Supplementary material for: Anti-Interference Detection of Vibrio parahaemolyticus from Aquatic Food Based on Target-Cyclized RCA with Dynamic Adapter Followed by LAMP
Source: MDPI journal article supplement (doi:10.3390/foods11030352), 2022-01-26
Supplement: s1 [file s1]

**Table S1. Sequences of oligonucleotides used in this study.**

| Name            | sequence (5'-3')                                     | nt |
|-----------------|------------------------------------------------------|----|
| <b>EX-F-558</b> | ACTCAACCAAGTCATTCTGAGA                               | 22 |
| <b>EX-R-558</b> | TCTGATGCCGCATAGTTAAGC                                | 21 |
| <b>F-558</b>    | AATAAGGGCGACACGGAAAT                                 | 20 |
| <b>R-558</b>    | TGGATCTCAACAGCGGTAAG                                 | 20 |
| <b>Ta</b>       | ACTTCTGACAACGATCGGAGGACCGAAGGAGCTAACCG               | 38 |
| <b>Tb</b>       | GACGGCGGTTAGCTCCTTCGGTCCTCCGATCGTTGTCAGAAGT          | 43 |
| <b>558-5-5N</b> | CCGTCGCCGC                                           | 10 |
| <b>558-5-5P</b> | AAGAGGCGGC                                           | 10 |
| <b>558-5-4N</b> | CCGTCGCTGC                                           | 10 |
| <b>558-5-4P</b> | AAGAGGCAGC                                           | 10 |
| <b>558-5-3N</b> | CCGTCGTCAC                                           | 10 |
| <b>558-5-3P</b> | AAGAGGTGAC                                           | 10 |
| <b>558-5-2N</b> | CCGTCGTTAC                                           | 10 |
| <b>558-5-2P</b> | AAGAGGTAAC                                           | 10 |
| <b>558-6-6N</b> | CCGTCGCGCCG                                          | 11 |
| <b>558-6-6P</b> | AAGAGCGGCGC                                          | 11 |
| <b>558-7-7N</b> | CCGTCCGCGCGC                                         | 12 |
| <b>558-7-7P</b> | AAGAGCGCGGCG                                         | 12 |
| <b>605-5-5N</b> | TAGTTGCCGC                                           | 10 |
| <b>605-5-5P</b> | CGCTAGCGGC                                           | 10 |
| <b>FIP</b>      | TCGTTCCATTTGTACATTGGACGTACAATAAGTACGACTCTAGC         | 45 |
| <b>BIP</b>      | CTATGCGTACTATTTTTGAAGCTGGCACTGTTAGCACCACCGAAGT<br>CA | 48 |

Note: a) **EX-F-558** and **EX-R-558** are the primers to prepare the target used in target cyclization research; b) **F-558** and **R-558** are the primers to detect the target cyclization yield by qPCR; c) **Ta** and **Tb** form the short duplex to mimic the target in Figure 1A; d) **558-5-5N** to **558-7-7P** are the sequences of dynamic adapters in target cyclization research. The sequence **N** is un-phosphorylated strand and the sequence **P** is phosphorylated strand. The bold parts are the complimentary parts of the adapters; e) **605-5-5N** and **605-5-5P** are the sequences of the adapter used in the detection of *V. parahaemolyticus*; f) **FIP** and **BIP** are the primers for simplified LAMP; g) The numbers of 558 and 605 indicate the length of the DNA target fragments.

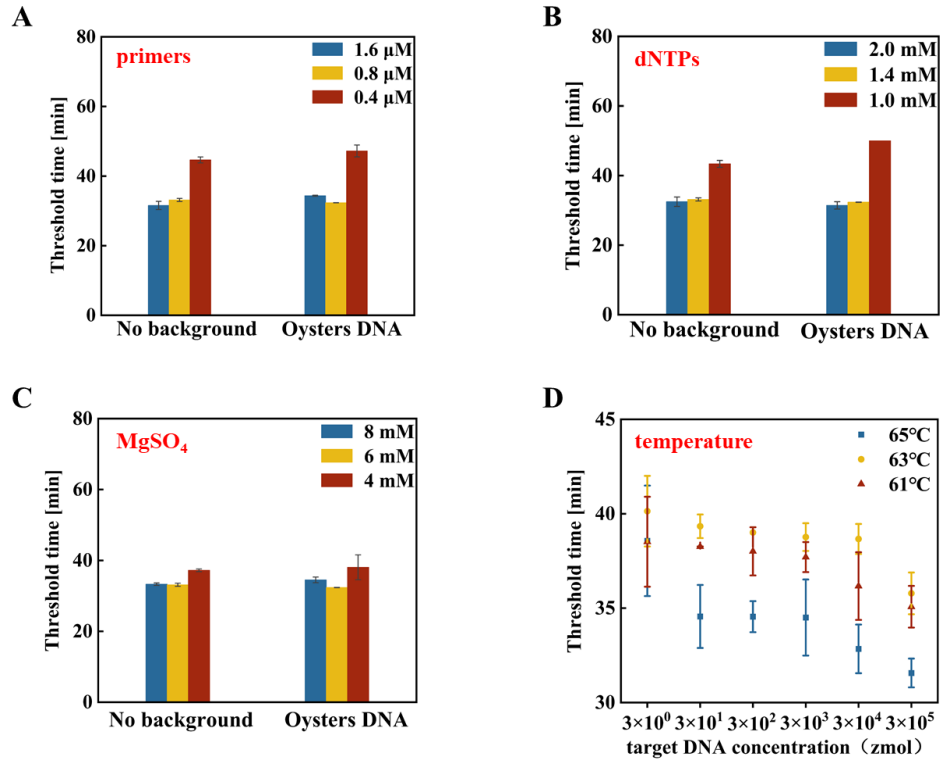

**Figure S1. Optimization of reaction conditions for tRCA-lamp. (A)** Concentration of primer.

[target DNA] = 3 amol, [MgSO<sub>4</sub>] = 8 mmol/L, [dNTP] = 1.4 mmol/L and 3.2 U Bst2.0 DNA polymerase at 65°C for 1 h. **(B)** Concentration of dNTP. [target DNA] = 3 amol, [primers] = 0.8  $\mu$ mol/L, [MgSO<sub>4</sub>] = 8 mmol/L and 3.2 U Bst2.0 DNA polymerase at 65°C for 1 h. **(C)** Concentration of MgSO<sub>4</sub>. [target DNA] = 3 amol, [primers] = 0.8  $\mu$ mol/L, [dNTP] = 1.4 mmol/L and 3.2 U Bst2.0 DNA polymerase at 65°C for 1 h. **(D)** Reaction temperature. [target DNA] = 3 amol, [primers] = 0.8  $\mu$ mol/L, [MgSO<sub>4</sub>] = 8 mmol/L, [dNTP] = 1.4 mmol/L and 3.2 U Bst2.0 DNA polymerase for 1 h.

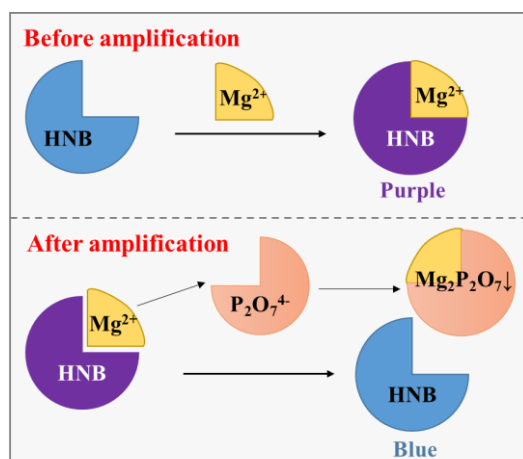

**Figure S2. Principle of the colour changes of HNB before and after the amplification.** Before the amplification, HNB is purple due to its binding with Mg<sup>2+</sup>. With the proceeding of amplification, Mg<sup>2+</sup> forms sediment gradually with the pyrophosphates so that HNB becomes blue, its original colour.

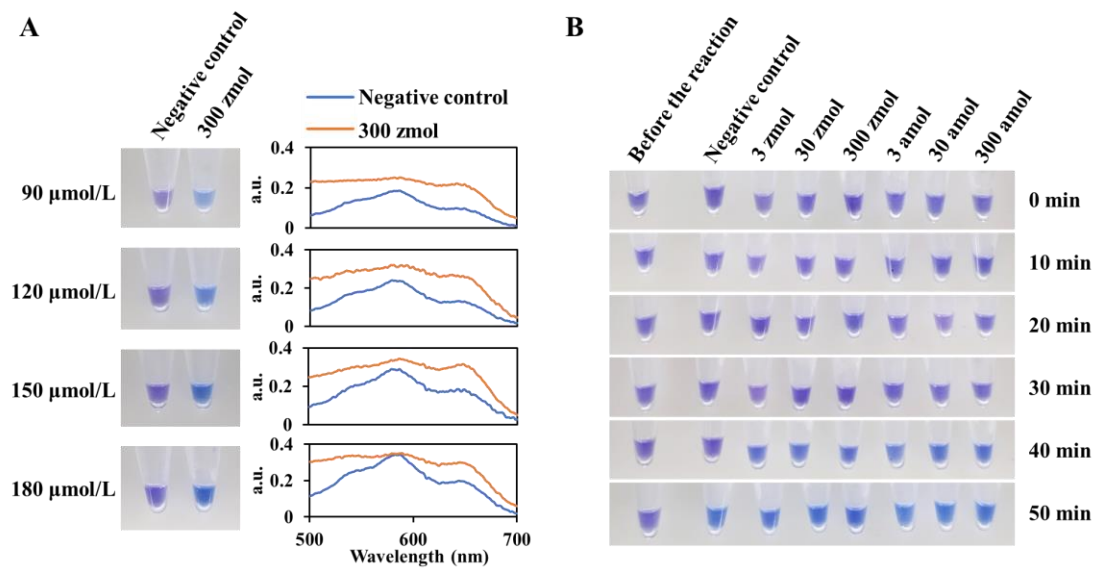

**Figure S3. Optimization of the visual detection by HNB.** (A) Colour changes under various concentrations of HNB. The corresponding spectra are also shown. Amplification time is 40 min. (B) Colour changes under different amplification time. [HNB]=120  $\mu\text{mol/L}$ .

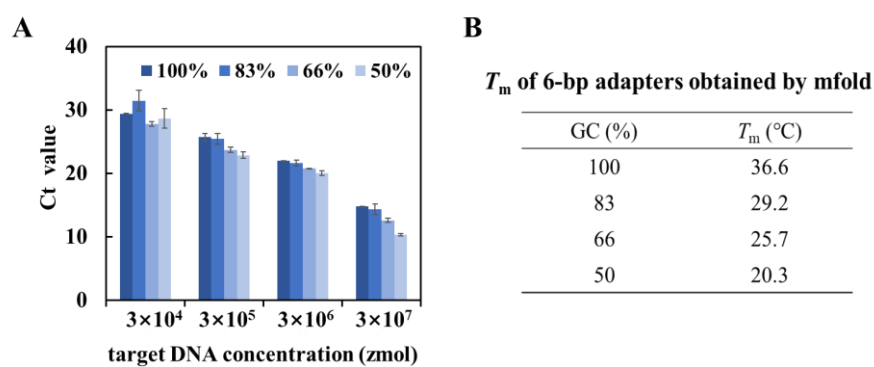

**Figure S4. Target cyclization by 6-bp adapters with GC contents of duplex part from 50% to 100%. (A)** Ligation reactions: [adapter] = 10 nmol/L, 2.5 U T4 DNA Ligase at 25°C for 2 h; qPCR reactions: [primers] = 0.4  $\mu$ mol/L, 1  $\mu$ L ligation products, the Ct values were the average of three individual experiments. **(B)** *T<sub>m</sub>* values of adapters simulated by Mfold under the conditions of 10 mmol/L Na<sup>+</sup> and 10 mmol/L Mg<sup>2+</sup>.

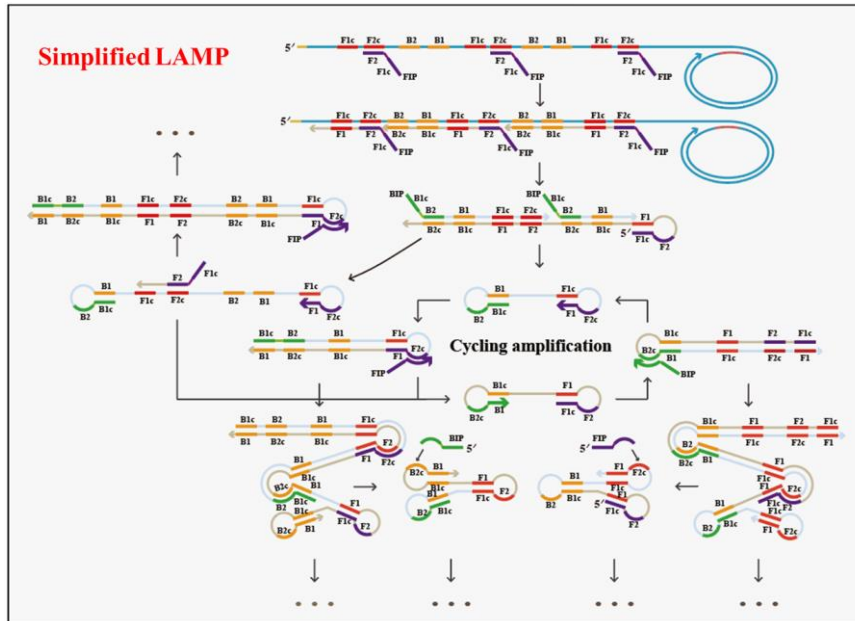

**Figure S5. Detailed principle of simplified LAMP.**
